# Supplementary material
Source: Royal Society of Chemistry journal article supplement (doi:10.1039/d6nr00092d)
Supplement: d6nr00092d1.pdf [file d6nr00092d1.pdf]

## *Supporting Information*

### **High-Performance Low-cost Triboelectric Nanogenerator Enabled by Biomass-Derived Carbon in PVDF Nanofibers**

Wei Shen,<sup>a</sup> Tianjie Deng,<sup>a</sup> Juan Shi,<sup>a</sup> Dinghua Yang,<sup>a</sup> Ya Nie,<sup>a</sup> Xi Zhang\*,<sup>a</sup> and  
Gang Xiang\*<sup>a</sup>

<sup>a</sup> College of Physics, Sichuan University, Chengdu 610064, China

\* Corresponding E-mail: Zhang, X (xizhang@scu.edu.cn); Xiang, G

(gxiang@scu.edu.cn)

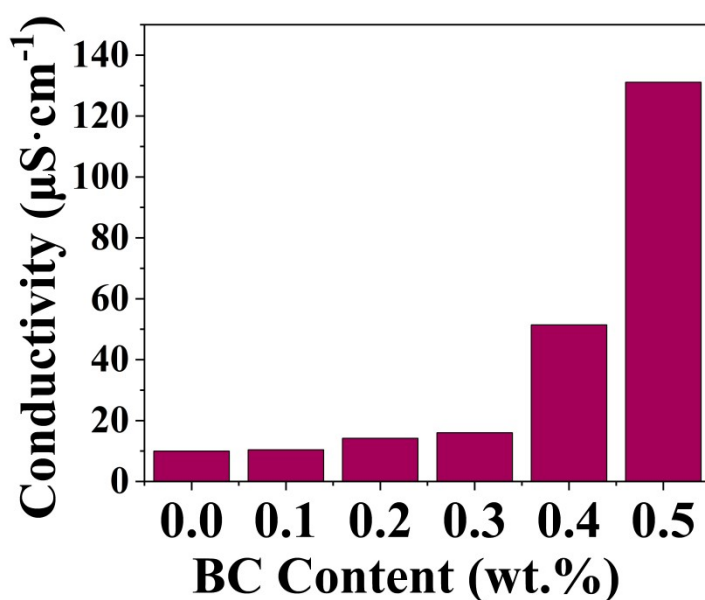

**Fig. S1.** Conductivity of the precursor solution versus BC content (0-0.5 wt.%).

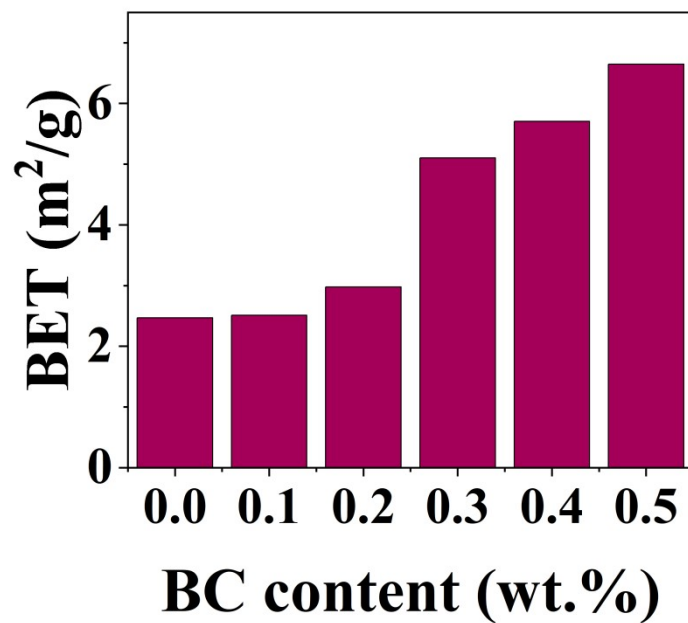

**Fig. S2.** BET test of PVDF NFs with different BC content (0-0.5 wt.%).

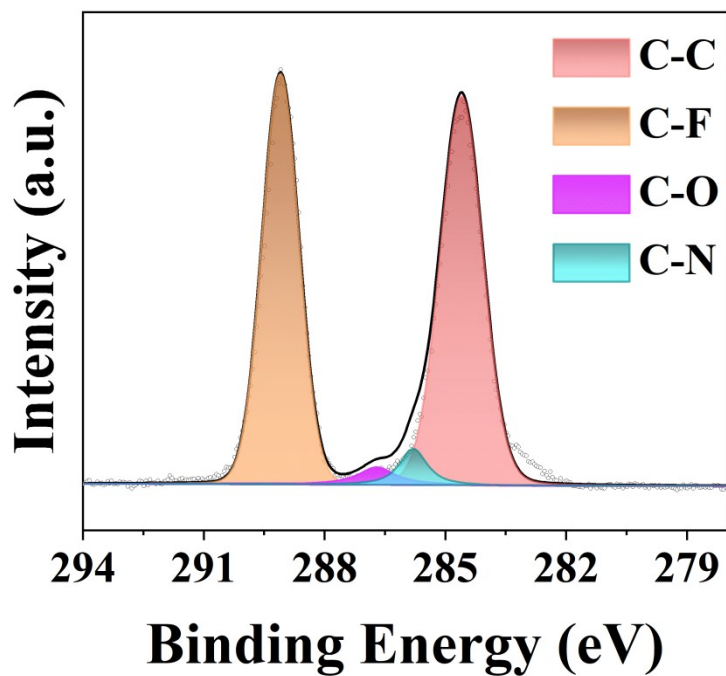

**Fig. S3.** X-ray photoelectron spectroscopy (XPS) of PVDF NFs with 0.2wt. % BC content.

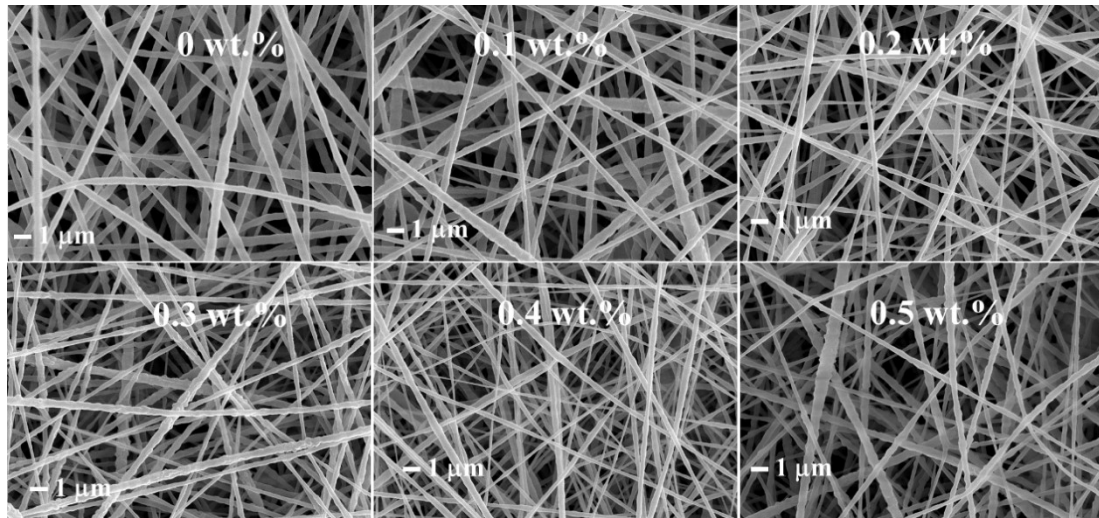

**Fig. S4.** Scanning electron microscopy (SEM) images of PVDF NFs with 0, 0.1, 0.2, 0.3, 0.4, and 0.5 wt.% BC content.
